# Supplementary material
Source: PubMed Central journal article supplement (PMC3246228)

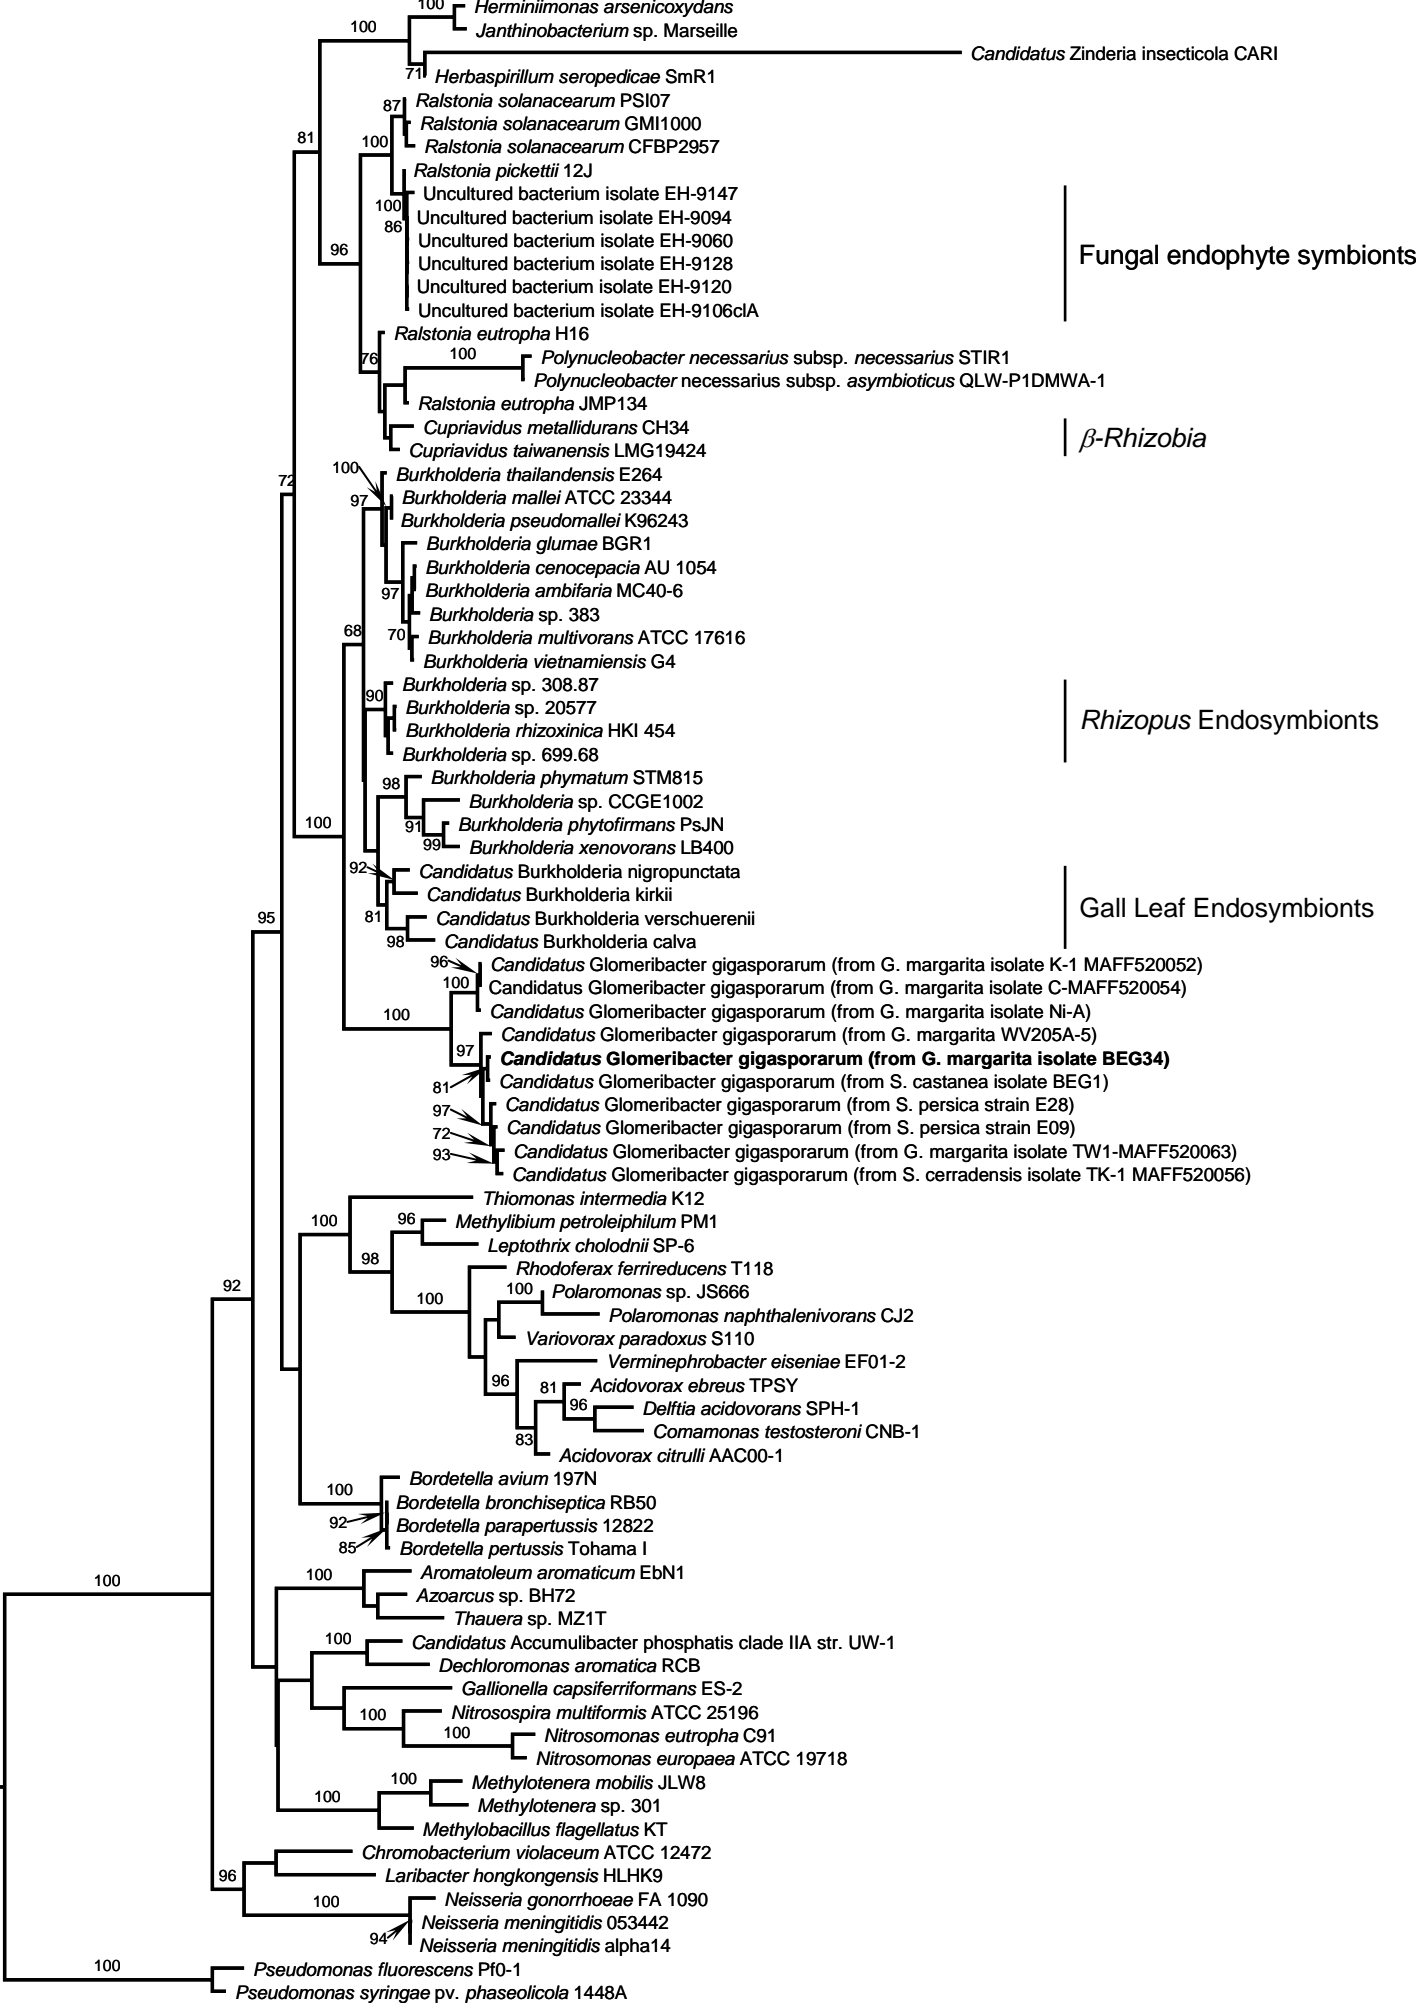

0.09

Supplement: ismej2011110x2.pdf [file ismej2011110x2.pdf]

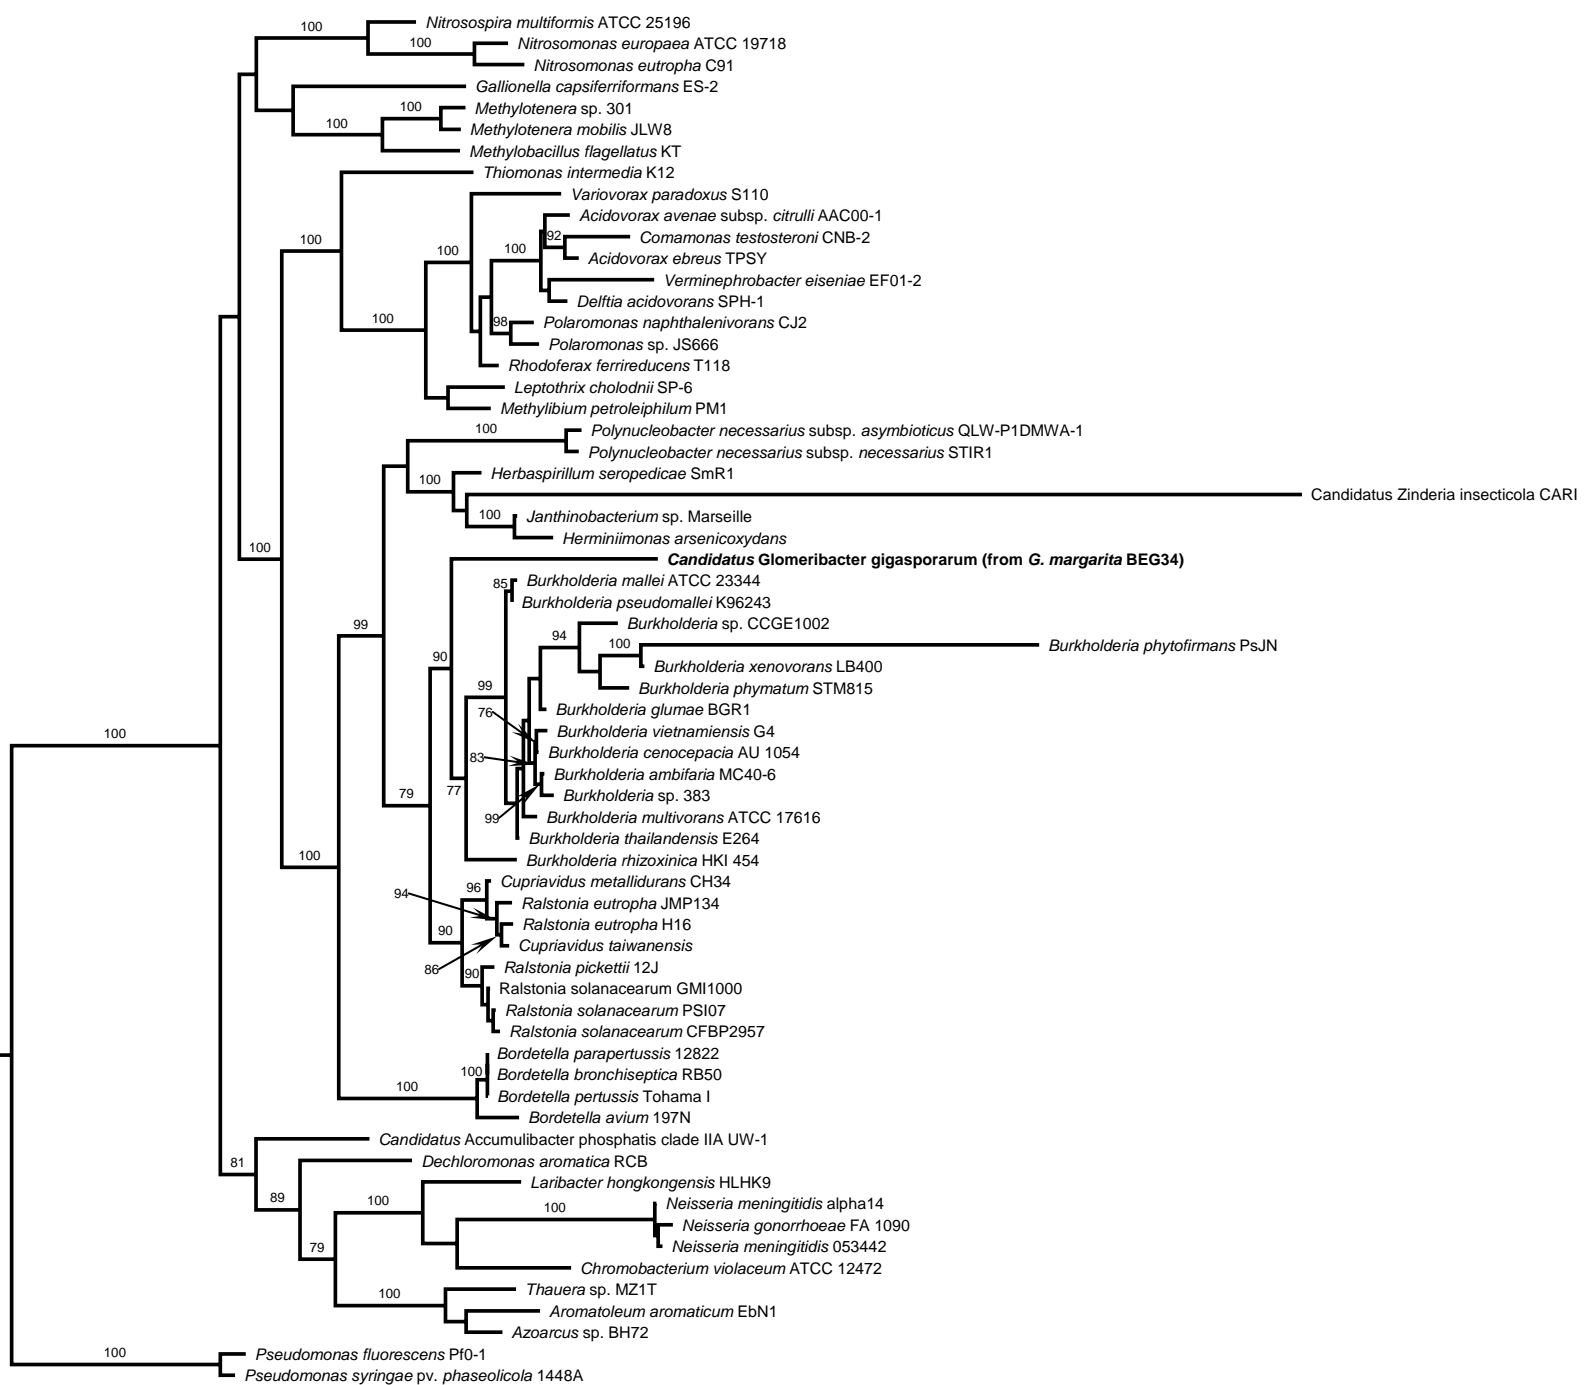

Supplement: ismej2011110x3.pdf [file ismej2011110x3.pdf]
